# Supplementary material for: Endophytic Colonization by the Entomopathogenic Fungus Beauveria Bassiana Affects Plant Volatile Emissions in the Presence or Absence of Chewing and Sap-Sucking Insects
Source: Front Plant Sci. 2021 Jul 26;12:660460. doi: 10.3389/fpls.2021.660460 (PMC8350324; doi:10.3389/fpls.2021.660460)
Supplement: Supplementary file 1 [file Table_1.xlsx]

## Sheet: Supplementary Table S1
Supplementary Table S1. One-way analysis of variance (ANOVA) for the volatile compounds emitted from endophytically colonized cotton plants before and after caterpillar infestation in the three assays. Data are expressed as foldchange relative to the control plants. Cot-cnt: control at T0+T1, cot+cat: control and caterpillar-infested at T2, cot+endo: treated at T0+T1, cot+endo+cat: treated and ca…
									REPETITION 1								REPETITION 2								REPETITION 3
Compound	Code	RT (min)	LRIcalculated	LRIdatabase	MF	RMF	Identification level	CAS	cot-cnt	cot+cat	cot+endo	cot+endo+cat	p.value				cot-cnt	cot+cat	cot+endo	cot+endo+cat	p.value				cot-cnt	cot+cat	cot+endo	cot+endo+cat	e
2,2-dimethylbutanal	Metabolite_1	3.94113	726.972	-	818	855	Level 3	2094-75-9	1.00 ± 0.68	0.93 ± 0.42	1.32 ± 0.62	1.10 ± 0.76	ns			Metabolite_1	1.000 ± 0.922a	0.031 ± 0.026b	1.170 ± 1.199a	0.025 ± 0.020b	*			Metabolite_1	1.00 ± 0.49	1.16 ± 0.11	1.01 ± 0.15	1.03 ± 0.09	ns
3-methylpentan-3-yl carbamate	Metabolite_2	4.6374	756.726	-	710	721	Level 3	78-28-4	1.00 ± 0.42	0.90 ± 0.35	0.84 ± 0.26	0.89 ± 0.34	ns			Metabolite_2	1.000 ± 1.124ab	0.019 ± 0.014b	1.439 ± 1.471a	0.002 ± 0.005b	*			Metabolite_2	1.00 ± 2.59	1.66 ± 4.07	0.27 ± 0.92	1.24 ± 2.22	ns
2-chloro-2-methylpentane	Metabolite_3	4.67503	758.335	-	793	869	Level 3	4325-48-8	1.00 ± 0.36b	0.91 ± 0.18b	1.43 ± 0.30a	1.26 ± 0.30ab	**			Metabolite_3	1.000 ± 0.913a	0.016 ± 0.007b	1.165 ± 1.147a	0.015 ± 0.008b	*			Metabolite_3	1.00 ± 0.14	0.99 ± 0.07	1.00 ± 0.11	0.92 ± 0.10	ns
unknown	Metabolite_4	5.18312	780.048	-	596	620	Level 4	918-84-3	1.00 ± 0.23ab	0.79 ± 0.09b	1.12 ± 0.28a	0.80 ± 0.09b	**			Metabolite_4	1.00 ± 0.24b	2.89 ± 1.04a	1.02 ± 0.32b	0.76 ± 0.20b	***			Metabolite_4	1.00 ± 0.03a	0.93 ± 0.01c	0.97 ± 0.02b	0.94 ± 0.02c	***
3-chloro-3-methylpentane	Metabolite_5	5.21323	781.335	-	778	818	Level 3	918-84-3	1.00 ± 1.12b	1.30 ± 1.04b	3.66 ± 2.62a	3.72 ± 2.67a	**			Metabolite_5	1.000 ± 0.925a	0.038 ± 0.039c	0.741 ± 0.707ab	0.049 ± 0.055bc	*			Metabolite_5	1.00 ± 1.13	1.29 ± 0.99	1.36 ± 1.22	1.05 ± 0.83	ns
unknown	Metabolite_6	5.6498	801	800	854	880	Level 4	111-65-9	1.00 ± 0.36b	11.88 ± 13.62a	1.16 ± 0.34b	7.80 ± 4.26a	**			Metabolite_6	1.00 ± 0.29b	4.97 ± 1.22a	1.50 ± 1.78b	4.55 ± 2.64a	***			Metabolite_6	1.00 ± 0.37	1.26 ± 0.80	3.68 ± 5.09	2.10 ± 0.77	ns
octane	Metabolite_7	5.60088	797.901	800	937	938	Level 2	111-65-9	1.00 ± 0.22a	0.57 ± 0.25b	1.15 ± 0.31a	0.61 ± 0.12b	***			Metabolite_7	1.00 ± 0.13a	0.31 ± 0.06b	1.00 ± 0.19a	0.37 ± 0.06b	***			Metabolite_7	1.00 ± 0.07	0.96 ± 0.05	0.89 ± 0.16	0.90 ± 0.03	ns
unknown	Metabolite_8	5.78153	805.621	-	748	776	Level 4	108-11-2	1.00 ± 0.38bc	0.85 ± 0.12c	1.53 ± 0.32a	1.26 ± 0.36ab	***			Metabolite_8	1.000 ± 0.868a	0.028 ± 0.006b	1.215 ± 1.176a	0.032 ± 0.007b	*			Metabolite_8	1.00 ± 0.13a	0.94 ± 0.08ab	0.93 ± 0.13ab	0.80 ± 0.13b	*
unknown	Metabolite_9	6.07508	818.166	-	608	676	Level 4	-	1.00 ± 2.19b	13.95 ± 16.67a	2.48 ± 3.57b	19.95 ± 12.78a	***			Metabolite_9	1.000 ± 0.855ab	0.067 ± 0.088b	1.993 ± 2.561a	0.061 ± 0.068b	*			Metabolite_9	1.000 ± 1.238	0.014 ± 0.034	0.709 ± 1.075	0.060 ± 0.103	ns
2,4-dimethylheptane	Metabolite_11	6.12778	820.418	818	903	916	Level 2	2213-23-2	1.00 ± 0.86b	1.32 ± 0.78b	1.76 ± 0.95b	3.38 ± 2.30a	**			Metabolite_11	1.00 ± 0.88a	0.27 ± 0.21b	1.09 ± 0.80a	0.28 ± 0.17b	*			Metabolite_11	1.00 ± 0.47	0.51 ± 0.15	1.50 ± 1.43	0.67 ± 0.35	ns
unknown	Metabolite_12	6.12778	820.418	818	894	912	Level 4	2213-23-2	1.00 ± 0.94b	1.30 ± 0.77b	1.86 ± 0.98ab	2.83 ± 2.23a	*			Metabolite_12	1.00 ± 0.80a	0.24 ± 0.22b	1.11 ± 0.79a	0.28 ± 0.16b	*			Metabolite_12	1.00 ± 0.45	0.51 ± 0.14	1.43 ± 1.28	0.67 ± 0.34	ns
unknown	Metabolite_13	6.57188	839.397	842	904	905	Level 4	19549-87-2	1.00 ± 0.78	0.90 ± 0.63	0.90 ± 0.52	1.95 ± 1.59	ns			Metabolite_13	1.00 ± 0.37a	0.29 ± 0.22b	1.24 ± 0.76a	0.31 ± 0.24b	***			Metabolite_13	1.00 ± 0.48	0.51 ± 0.14	1.10 ± 0.87	0.60 ± 0.34	ns
unknown	Metabolite_14	6.5794	839.718	842	920	921	Level 4	19549-87-2	1.00 ± 0.89	1.44 ± 1.04	1.08 ± 0.56	1.71 ± 1.36	ns			Metabolite_14	1.00 ± 0.69a	0.18 ± 0.15b	1.05 ± 0.82a	0.25 ± 0.16b	*			Metabolite_14	1.00 ± 0.49	0.52 ± 0.14	1.21 ± 0.96	0.59 ± 0.34	ns
2,4-dimethylhept-1-ene	Metabolite_15	6.5794	839.718	842	920	920	Level 2	19549-87-2	1.00 ± 0.75	1.37 ± 0.93	1.00 ± 0.51	2.06 ± 1.47	ns			Metabolite_15	1.00 ± 0.66a	0.22 ± 0.15b	1.10 ± 0.81a	0.26 ± 0.16b	**			Metabolite_15	1.00 ± 0.46	0.51 ± 0.13	1.17 ± 0.91	0.58 ± 0.33	ns
(E)-hex-2-enal	Metabolite_16	6.88048	852.585	853	910	911	Level 1	505-57-7	1.00 ± 1.09b	41.41 ± 67.56a	5.10 ± 10.44b	26.39 ± 19.56ab	*			Metabolite_16	1.00 ± 1.44	3.46 ± 1.84	3.48 ± 9.79	2.76 ± 1.95	ns			Metabolite_16	1.00 ± 0.90	6.07 ± 3.74	16.61 ± 28.16	11.54 ± 6.52	ns
(NZ)-N-(2-methylbutylidene)hydroxylamine	Metabolite_17	6.96705	856.284	-	818	833	Level 3	49805-56-3	1.00 ± 1.85b	97.48 ± 37.60a	3.05 ± 2.60b	178.92 ± 183.02a	***			Metabolite_17	1.00 ± 0.86b	2.17 ± 1.13ab	1.00 ± 1.01b	3.43 ± 3.98a	*			Metabolite_17	1.00 ± 1.06b	22.22 ± 22.05ab	0.48 ± 0.58b	44.55 ± 50.92a	***
(Z)-hex-3-en-1-ol	Metabolite_18	6.93318	854.837	855	929	938	Level 2	928-96-1	1.00 ± 1.67b	64.75 ± 116.40a	3.16 ± 3.17b	32.28 ± 25.81ab	*			Metabolite_18	1.00 ± 2.25	1.07 ± 0.47	2.45 ± 6.54	0.97 ± 0.69	ns			Metabolite_18	1.00 ± 1.17	1.78 ± 2.11	8.12 ± 12.10	5.13 ± 2.93	ns
unknown	Metabolite_19	6.96705	856.284	-	714	832	Level 4	544-12-7	1.00 ± 0.39b	11.76 ± 10.42a	1.33 ± 0.74b	10.07 ± 5.44a	***			Metabolite_19	1.00 ± 0.83	0.53 ± 0.20	1.29 ± 1.73	1.17 ± 0.65	ns			Metabolite_19	1.00 ± 0.69b	2.71 ± 1.82ab	2.07 ± 2.15b	4.91 ± 3.31a	**
unknown	Metabolite_20	7.0348	859.179	864	815	840	Level 4	2216-34-4	1.00 ± 0.70	0.89 ± 0.69	1.21 ± 0.79	2.22 ± 2.81	ns			Metabolite_20	1.00 ± 0.65b	0.70 ± 0.79b	1.92 ± 1.45a	0.40 ± 0.29b	*			Metabolite_20	1.00 ± 0.50	0.69 ± 0.35	1.06 ± 0.85	0.97 ± 0.78	ns
4-methyloctane	Metabolite_21	7.08748	861.431	864	854	866	Level 2	2216-34-4	1.00 ± 0.72	1.23 ± 0.60	1.52 ± 0.72	2.20 ± 1.36	ns			Metabolite_21	1.00 ± 0.53a	0.35 ± 0.25b	1.18 ± 0.65a	0.35 ± 0.12b	**			Metabolite_21	1.00 ± 0.37	0.72 ± 0.11	1.38 ± 0.81	0.95 ± 0.34	ns
(E)-hex-2-en-1-ol	Metabolite_22	7.19663	866.095	879	878	894	Level 2	928-95-0	1.00 ± 1.10	25.31 ± 49.63	2.09 ± 1.43	9.44 ± 6.97	ns			Metabolite_22	1.00 ± 2.60	0.20 ± 0.18	2.16 ± 5.97	0.16 ± 0.13	ns			Metabolite_22	1.00 ± 1.54	1.27 ± 1.71	17.16 ± 32.96	2.98 ± 1.96	ns
1,1,2-trimethyl-3-(2-methylpropyl)cyclopropane	Metabolite_23	7.50148	879.123	-	734	840	Level 3	41977-43-9	1.00 ± 0.23b	0.86 ± 0.08b	1.24 ± 0.23a	1.00 ± 0.11b	**			Metabolite_23	1.00 ± 0.43bc	1.85 ± 0.68a	1.10 ± 0.61b	0.50 ± 0.13c	***			Metabolite_23	1.00 ± 0.04a	0.96 ± 0.02b	0.99 ± 0.04ab	0.96 ± 0.01b	*
1,2,3,4,5-pentamethylcyclopentane	Metabolite_24	7.53535	880.571	-	704	725	Level 3	-	1.00 ± 0.33b	1.09 ± 0.60b	1.49 ± 0.32a	1.07 ± 0.28b	*			Metabolite_24	1.00000 ± 0.53199a	-0.03115 ± 0.08284b	1.06065 ± 0.68464a	0.13107 ± 0.05264b	***			Metabolite_24	1.00 ± 0.09	0.91 ± 0.05	1.03 ± 0.12	0.96 ± 0.04	ns
1-(6-methyl-7-oxabicyclo[4.1.0]heptan-1-yl)ethanone	Metabolite_25	7.78752	891.347	-	650	666	Level 3	15120-94-2	1.00 ± 0.27b	0.85 ± 0.14b	1.31 ± 0.27a	1.02 ± 0.18b	**			Metabolite_25	1.000 ± 0.492a	0.016 ± 0.028b	1.151 ± 0.728a	0.160 ± 0.047b	***			Metabolite_25	1.00 ± 0.09	0.88 ± 0.02	1.01 ± 0.16	0.94 ± 0.02	ns
1,2,3,4,5-pentamethylcyclopentene	Metabolite_26	7.87408	895.046	-	883	889	Level 3	-	1.00 ± 0.30b	0.93 ± 0.17b	1.41 ± 0.29a	1.23 ± 0.23ab	**			Metabolite_26	1.000 ± 0.784a	0.036 ± 0.005b	1.211 ± 1.087a	0.046 ± 0.009b	**			Metabolite_26	1.00 ± 0.14	0.99 ± 0.08	0.96 ± 0.11	0.91 ± 0.08	ns
2,3-dimethyl-2,3-dinitrobutane	Metabolite_27	7.97193	899.228	-	711	754	Level 3	3964-18-9	1.00 ± 0.30b	1.03 ± 0.25b	1.47 ± 0.38a	1.27 ± 0.27ab	**			Metabolite_27	1.000 ± 0.667a	0.071 ± 0.013b	1.076 ± 0.841a	0.079 ± 0.020b	**			Metabolite_27	1.00 ± 0.11	0.92 ± 0.10	0.91 ± 0.17	0.94 ± 0.08	ns
heptanal	Metabolite_28	7.99075	905	901	842	848	Level 2	111-71-7	1.00 ± 1.01ab	0.38 ± 0.38b	1.55 ± 0.99a	0.54 ± 0.22b	*			Metabolite_28	1.000 ± 0.861	0.075 ± 0.027	1.746 ± 2.224	0.057 ± 0.028	ns			Metabolite_28	1.00 ± 0.87	0.39 ± 0.12	1.40 ± 1.39	0.33 ± 0.19	ns
1,2,3,4,5-pentamethylcyclopentene	Metabolite_29	8.337	916.022	-	805	814	Level 3	-	1.00 ± 0.19b	0.89 ± 0.11b	1.33 ± 0.29a	1.23 ± 0.18a	***			Metabolite_29	1.000 ± 0.702a	0.049 ± 0.007b	1.177 ± 0.965a	0.070 ± 0.014b	**			Metabolite_29	1.00 ± 0.09	0.98 ± 0.06	0.97 ± 0.07	0.92 ± 0.08	ns
1,2,3,3,4-pentamethylcyclopentene	Metabolite_30	8.38217	917.977	-	832	837	Level 3	197390-29-7	1.00 ± 0.33b	1.01 ± 0.18b	1.46 ± 0.33a	1.28 ± 0.24ab	**			Metabolite_30	1.000 ± 0.770a	0.035 ± 0.006b	1.169 ± 1.012a	0.052 ± 0.009b	**			Metabolite_30	1.00 ± 0.10	0.97 ± 0.07	0.96 ± 0.09	0.91 ± 0.09	ns
2,4,4-trimethylhex-1-ene	Metabolite_31	8.58915	926.937	-	804	864	Level 3	51174-12-0	1.00 ± 0.25b	0.92 ± 0.17b	1.42 ± 0.32a	1.29 ± 0.22a	***			Metabolite_31	1.000 ± 0.718a	0.050 ± 0.006b	1.195 ± 1.015a	0.058 ± 0.011b	**			Metabolite_31	1.00 ± 0.12	0.93 ± 0.08	0.95 ± 0.10	0.88 ± 0.09	ns
2,3,3-trimethylhex-1-ene	Metabolite_32	8.64185	929.219	-	830	909	Level 3	-	1.00 ± 0.31b	0.96 ± 0.17b	1.46 ± 0.35a	1.24 ± 0.23ab	**			Metabolite_32	1.000 ± 0.699a	0.056 ± 0.011b	1.172 ± 0.979a	0.064 ± 0.013b	**			Metabolite_32	1.00 ± 0.16	0.96 ± 0.09	0.97 ± 0.09	0.89 ± 0.10	ns
2,6,6-trimethylbicyclo[3.1.1]hept-2-ene (à-pinene)	Metabolite_33	8.71335	932.314	917	942	945	Level 2	80-56-8	1.00 ± 1.62b	2.84 ± 3.98b	1.49 ± 1.64b	6.35 ± 4.90a	**			Metabolite_33	1.00 ± 1.43	0.38 ± 0.38	1.46 ± 1.72	0.35 ± 0.18	ns			Metabolite_33	1.00 ± 3.46	27.58 ± 67.56	1.24 ± 4.29	38.82 ± 95.08	ns
unknown	Metabolite_34	8.74723	933.781	917	922	929	Level 4	80-56-8	1.00 ± 1.65	2.56 ± 4.05	1.28 ± 1.49	4.23 ± 3.99	ns			Metabolite_34	1.00 ± 1.34	0.33 ± 0.27	1.25 ± 1.51	0.23 ± 0.06	ns			Metabolite_34	1.00 ± 0.80b	0.89 ± 0.44b	0.82 ± 0.73b	2.07 ± 0.55a	**
3-ethyl-2,5-dimethylhex-3-ene	Metabolite_35	8.84132	937.854	-	777	790	Level 3	62338-08-3	1.00 ± 0.34b	0.96 ± 0.19b	1.42 ± 0.32a	1.26 ± 0.25ab	**			Metabolite_35	1.000 ± 0.667a	0.068 ± 0.012b	1.214 ± 1.017a	0.073 ± 0.015b	**			Metabolite_35	1.00 ± 0.16	1.04 ± 0.18	1.13 ± 0.62	1.20 ± 0.29	ns
2,2-dimethyl-3-methylidenebicyclo[2.2.1]heptane (camphene)	Metabolite_36	9.0596	947.303	949	889	945	Level 2	79-92-5	1.00 ± 0.89c	3.45 ± 3.74ab	1.46 ± 0.91bc	5.84 ± 3.92a	***			Metabolite_36	1.00 ± 0.91	0.38 ± 0.24	1.25 ± 1.14	0.38 ± 0.16	ns			Metabolite_36	1.00 ± 0.80	0.86 ± 1.28	0.54 ± 0.46	0.68 ± 0.64	ns
unknown	Metabolite_37	9.04832	946.815	-	750	795	Level 4	2497-25-8	1.00 ± 0.36b	0.83 ± 0.08b	1.30 ± 0.42a	1.02 ± 0.15ab	*			Metabolite_37	1.00 ± 0.56a	0.09 ± 0.02b	1.23 ± 0.88a	0.10 ± 0.02b	***			Metabolite_37	1.00 ± 0.14	1.07 ± 0.26	1.16 ± 0.89	1.11 ± 0.21	ns
1-isopropyl-3-methyl-trans-cyclohexane	Metabolite_38	9.04455	946.652	-	828	828	Level 3	-	1.00 ± 0.24b	0.93 ± 0.15b	1.40 ± 0.32a	1.26 ± 0.18a	***			Metabolite_38	1.000 ± 0.718a	0.051 ± 0.007b	1.173 ± 0.985a	0.061 ± 0.012b	**			Metabolite_38	1.00 ± 0.11	0.99 ± 0.06	0.97 ± 0.11	0.91 ± 0.10	ns
4,4,5-trimethyl-2-pentadecyl-1,3-dioxolane	Metabolite_40	9.36445	960.5	-	650	652	Level 3	56599-79-2	1.00 ± 0.43b	0.80 ± 0.32b	1.43 ± 0.35a	1.18 ± 0.29ab	**			Metabolite_40	1.0000 ± 0.8030a	0.0005 ± 0.0009b	1.3622 ± 1.3325a	0.0006 ± 0.0009b	**			Metabolite_40	1.00 ± 0.47	0.48 ± 0.33	1.06 ± 1.01	0.40 ± 0.40	ns
benzaldehyde	Metabolite_41	9.33435	959.197	961	877	907	Level 1	100-52-7	1.00 ± 1.26b	0.22 ± 0.13b	2.31 ± 1.76a	1.41 ± 1.50ab	*			Metabolite_41	1.00 ± 0.60ab	0.20 ± 0.11b	1.60 ± 1.18a	0.36 ± 0.39b	**			Metabolite_41	1.00 ± 0.68	1.27 ± 0.86	1.32 ± 0.93	2.04 ± 1.67	ns
(-)-β-pinene	Metabolite_42	9.68812	974.512	-	905	907	Level 3	18172-67-3	1.00 ± 1.48b	2.31 ± 3.64ab	1.52 ± 1.62b	5.10 ± 4.00a	*			Metabolite_42	1.00 ± 1.42	0.25 ± 0.24	1.49 ± 1.71	0.22 ± 0.07	ns			Metabolite_42	1.00 ± 0.87b	1.10 ± 0.73b	0.66 ± 0.79b	2.13 ± 0.73a	**
unknown	Metabolite_43	9.9591	986.242	-	714	729	Level 4	18680-27-8	1.00 ± 1.35	0.60 ± 0.97	1.84 ± 1.17	1.41 ± 0.96	ns			Metabolite_43	1.000 ± 0.951	0.000 ± 0.000	3.272 ± 5.153	0.007 ± 0.016	ns			Metabolite_43	1.00 ± 2.86	0.37 ± 0.89	4.78 ± 7.31	0.75 ± 0.71	ns
5-ethyl-2,2,3-trimethylheptane	Metabolite_44	9.98545	987.383	-	790	840	Level 3	62199-06-8	1.00 ± 0.95b	0.20 ± 0.07b	2.38 ± 1.69a	0.40 ± 0.18b	**			Metabolite_44	1.000 ± 0.339a	0.037 ± 0.013c	0.754 ± 0.341b	0.068 ± 0.026c	***			Metabolite_44	1.00 ± 0.54	1.43 ± 0.19	0.97 ± 0.35	1.21 ± 0.53	ns
unknown	Metabolite_45	10.0043	988.198	-	869	876	Level 4	18172-67-3	1.00 ± 1.40b	3.01 ± 4.35b	1.43 ± 1.12b	7.93 ± 6.48a	**			Metabolite_45	1.00 ± 1.43	0.15 ± 0.18	1.28 ± 1.57	0.10 ± 0.03	ns			Metabolite_45	1.00 ± 1.05b	1.84 ± 2.07b	0.96 ± 1.13b	4.37 ± 2.30a	***
unknown	Metabolite_46	10.0682	990.968	-	591	619	Level 4	29171-20-8	1.00 ± 0.46b	0.68 ± 0.13b	1.32 ± 0.38a	0.89 ± 0.18b	**			Metabolite_46	1.000 ± 0.396a	0.033 ± 0.040b	1.289 ± 0.888a	0.182 ± 0.036b	***			Metabolite_46	1.00 ± 0.18a	0.79 ± 0.03b	0.97 ± 0.20a	0.84 ± 0.06ab	*
unknown	Metabolite_48	10.2752	999.928	-	745	762	Level 4	5944-20-7	1.00 ± 0.98	0.15 ± 0.17	1.02 ± 0.70	0.65 ± 0.43	ns			Metabolite_48	1.000 ± 0.489	0.027 ± 0.067	2.267 ± 3.253	0.011 ± 0.027	ns			Metabolite_48	1.00 ± 1.56	0.00 ± 0.00	3.62 ± 4.62	0.63 ± 1.54	ns
octanal	Metabolite_49	10.2978	1000.91	1005	813	828	Level 2	124-13-0	1.00 ± 1.51	0.82 ± 1.61	2.53 ± 2.22	1.48 ± 1.41	ns			Metabolite_49	1.000 ± 1.018	0.026 ± 0.036	2.188 ± 2.991	0.014 ± 0.021	ns			Metabolite_49	1.00 ± 1.45	0.15 ± 0.36	1.77 ± 1.88	0.48 ± 0.33	ns
(Z)-4-hexen-1-ol, acetate	Metabolite_50	10.3882	1009.04	-	905	928	Level 3	42125-17-7	1.00 ± 2.05	13.49 ± 33.03	1.74 ± 2.79	10.92 ± 12.88	ns			Metabolite_50	1.0000 ± 2.4718	0.0001 ± 0.0003	0.7443 ± 1.1334	0.0002 ± 0.0003	ns			Metabolite_50	1.00 ± 1.50b	3.04 ± 6.64b	3.57 ± 5.18b	9.76 ± 8.63a	*
2,3,5,8-tetramethyldecane	Metabolite_51	10.486	1013.53	-	766	773	Level 3	192823-15-7	1.00 ± 0.72	1.16 ± 1.30	1.04 ± 0.48	1.52 ± 0.96	ns			Metabolite_51	1.00 ± 0.39a	0.17 ± 0.14b	1.26 ± 0.73a	0.29 ± 0.13b	***			Metabolite_51	1.00 ± 0.28a	0.63 ± 0.16b	1.12 ± 0.51a	0.55 ± 0.24b	**
(2,2,6-trimethyl-bicyclo[4.1.0]hept-1-yl)-methanol	Metabolite_52	10.5801	1017.84	-	702	718	Level 3	78996-11-9	1.00 ± 0.55	0.66 ± 0.44	1.30 ± 0.49	1.27 ± 0.55	ns			Metabolite_52	1.000 ± 0.622a	0.006 ± 0.015b	1.359 ± 1.202a	0.003 ± 0.006b	**			Metabolite_52	1.00 ± 0.92ab	0.00 ± 0.00b	1.99 ± 2.08a	0.08 ± 0.20b	*
unknown	Metabolite_53	10.708	1023.71	-	870	872	Level 4	2243-98-3	1.00 ± 1.29b	1.79 ± 2.69b	2.16 ± 1.44b	5.19 ± 5.12a	*			Metabolite_53	1.00 ± 1.11	1.02 ± 0.71	1.64 ± 1.50	0.94 ± 0.49	ns			Metabolite_53	1.00 ± 0.86c	3.57 ± 1.91b	1.52 ± 0.96c	5.69 ± 2.11a	***
1-methyl-5-(1-methylethenyl)-cyclohexene	Metabolite_54	10.7683	1026.47	1028	843	913	Level 2	1461-27-4	1.00 ± 1.17	0.37 ± 0.32	1.19 ± 0.75	1.02 ± 0.72	ns			Metabolite_54	1.000 ± 0.540	0.055 ± 0.078	2.532 ± 3.662	0.166 ± 0.089	ns			Metabolite_54	1.00 ± 0.50c	1.64 ± 0.43b	1.07 ± 0.37c	2.36 ± 0.57a	***
unknown	Metabolite_55	10.836	1029.58	1028	895	922	Level 4	1461-27-4	1.00 ± 1.11b	1.93 ± 3.01b	1.41 ± 1.06b	4.56 ± 3.08a	**			Metabolite_55	1.00 ± 1.11	0.24 ± 0.21	1.75 ± 1.98	0.21 ± 0.08	ns			Metabolite_55	1.00 ± 1.10	0.61 ± 0.46	0.76 ± 0.82	1.11 ± 0.38	ns
unknown	Metabolite_56	10.9753	1035.97	-	653	808	Level 3	18450-74-3	1.00 ± 0.51	0.69 ± 0.21	1.22 ± 0.45	1.03 ± 0.34	ns			Metabolite_56	1.00 ± 0.24a	0.08 ± 0.09b	1.23 ± 0.64a	0.28 ± 0.06b	***			Metabolite_56	1.00 ± 0.60	0.76 ± 0.03	1.01 ± 0.49	0.85 ± 0.12	ns
3,7,7-trimethylbicyclo[4.1.0]hept-3-ene	Metabolite_57	11.2575	1048.91	1030	916	921	Level 2	13466-78-9	1.00 ± 1.70b	17.33 ± 17.74ab	1.32 ± 2.07b	31.63 ± 37.79a	**			Metabolite_57	1.0000 ± 1.4918	0.0001 ± 0.0002	0.8716 ± 1.1706	0.0001 ± 0.0002	ns			Metabolite_57	1.00 ± 2.01c	72.75 ± 81.67b	0.27 ± 0.57c	140.67 ± 114.66a	***
unknown	Metabolite_59	11.5473	1062.2	-	800	850	Level 4	31295-56-4	1.00 ± 1.07	0.92 ± 1.29	1.68 ± 1.11	2.08 ± 2.55	ns			Metabolite_59	1.00 ± 0.46a	0.20 ± 0.19b	1.35 ± 1.07a	0.13 ± 0.17b	**			Metabolite_59	1.00 ± 0.82	0.87 ± 0.09	1.26 ± 0.85	1.09 ± 0.36	ns
4-chloro-3-hexyloxane	Metabolite_60	11.6828	1068.41	-	667	704	Level 3	66555-66-6	1.00 ± 1.68	0.27 ± 0.63	1.58 ± 1.27	1.25 ± 0.90	ns			Metabolite_60	1.000 ± 0.705	0.039 ± 0.080	2.839 ± 4.709	0.005 ± 0.013	ns			Metabolite_60	1.00 ± 1.37	0.00 ± 0.00	1.65 ± 2.52	0.61 ± 0.95	ns
2-methylundecane-2-thiol	Metabolite_61	12.0178	1083.77	-	797	803	Level 3	10059-13-9	1.00 ± 0.80	0.89 ± 0.88	1.13 ± 0.54	1.45 ± 0.89	ns			Metabolite_61	1.00 ± 0.30ab	0.11 ± 0.11c	1.54 ± 1.31a	0.24 ± 0.10bc	**			Metabolite_61	1.00 ± 0.22a	0.67 ± 0.09c	0.97 ± 0.36ab	0.72 ± 0.17bc	*
unknown	Metabolite_62	12.3828	1100.51	-	795	828	Level 4	7149-26-0	1.00 ± 1.08b	1.78 ± 2.54b	1.64 ± 0.86b	5.58 ± 5.12a	**			Metabolite_62	1.00 ± 0.45ab	0.00 ± 0.00b	1.80 ± 1.79a	0.28 ± 0.23b	**			Metabolite_62	1.00 ± 0.51b	2.67 ± 4.42b	1.32 ± 0.95b	10.55 ± 15.98a	*
2,7,10-trimethyldodecane	Metabolite_63	12.4242	1102.41	-	832	855	Level 3	74645-98-0	1.00 ± 0.91	1.10 ± 1.24	1.42 ± 0.90	2.40 ± 1.82	ns			Metabolite_63	1.00 ± 0.46ab	0.27 ± 0.23b	1.65 ± 1.46a	0.33 ± 0.16b	**			Metabolite_63	1.00 ± 0.33ab	0.47 ± 0.12b	1.27 ± 0.93a	0.66 ± 0.42b	*
unknown	Metabolite_64	12.3828	1100.51	-	862	866	Level 4	115-95-7	1.00 ± 1.53b	8.78 ± 10.60b	1.94 ± 1.37b	31.72 ± 30.82a	***			Metabolite_64	1.00 ± 0.77	0.58 ± 0.53	1.93 ± 2.17	1.01 ± 1.75	ns			Metabolite_64	1.00 ± 2.17b	76.72 ± 136.35b	1.28 ± 2.06b	279.98 ± 389.82a	**
nonanal	Metabolite_66	12.4807	1102	1105	905	917	Level 1	124-19-6	1.00 ± 1.57ab	0.18 ± 0.30b	2.24 ± 1.99a	0.28 ± 0.22b	*			Metabolite_66	1.00000 ± 1.16153	0.00008 ± 0.00019	3.05203 ± 4.99521	0.01528 ± 0.01285	ns			Metabolite_66	1.00 ± 1.88	0.47 ± 0.19	2.35 ± 3.36	0.76 ± 0.28	ns
2,6-dimethyldecane	Metabolite_67	12.5484	1107.9	1119	810	858	Level 2	13150-81-7	1.00 ± 0.97	1.03 ± 1.24	1.35 ± 0.80	2.05 ± 1.51	ns			Metabolite_67	1.00 ± 0.44ab	0.30 ± 0.23b	1.48 ± 1.13a	0.31 ± 0.16b	**			Metabolite_67	1.00 ± 0.42	0.49 ± 0.13	1.21 ± 0.83	0.80 ± 0.53	ns
2-ethenyl-1,1-dimethyl-3-methylidenecyclohexane	Metabolite_68	12.7554	1116.77	-	848	856	Level 3	95452-08-7	1.00 ± 1.00b	11.78 ± 15.95ab	6.07 ± 9.38b	19.79 ± 19.11a	*			Metabolite_68	1.00 ± 1.03	1.13 ± 0.44	1.44 ± 1.86	1.44 ± 0.68	ns			Metabolite_68	1.00 ± 1.50b	6.12 ± 3.20a	0.41 ± 0.30b	9.26 ± 5.58a	***
[(E)-hex-3-enyl] butanoate	Metabolite_69	14.3926	1186.94	1185	783	895	Level 2	53398-84-8	1.00 ± 0.61	0.87 ± 0.75	1.24 ± 0.55	0.95 ± 0.37	ns			Metabolite_69	1.00 ± 0.18a	0.00 ± 0.00b	1.37 ± 0.83a	0.19 ± 0.12b	***			Metabolite_69	1.00 ± 0.29b	3.79 ± 5.98b	1.02 ± 0.29b	10.32 ± 8.65a	***
unknown	Metabolite_70	14.6485	1197.9	-	636	640	Level 4	-	1.00 ± 1.54	0.26 ± 0.65	1.93 ± 1.82	0.35 ± 0.56	ns			Metabolite_70	1.00 ± 0.76ab	0.09 ± 0.11b	1.67 ± 1.43a	0.23 ± 0.18b	**			Metabolite_70	1.00 ± 0.19a	0.45 ± 0.50b	0.50 ± 0.54b	0.56 ± 0.62ab	*
decanal	Metabolite_71	14.8141	1206	1200	872	880	Level 1	112-31-2	1.00 ± 0.97b	0.41 ± 0.39b	2.15 ± 1.43a	0.61 ± 0.34b	**			Metabolite_71	1.00000 ± 0.71279ab	-0.04124 ± 0.05417b	1.89317 ± 2.34740a	0.06481 ± 0.01858b	*			Metabolite_71	1.00 ± 0.70a	0.37 ± 0.07b	0.96 ± 0.60a	0.40 ± 0.13b	*
(Z)-hex-3-enyl isovalerate	Metabolite_72	15.4577	1225.83	1238	855	864	Level 2	35154-45-1	1.00 ± 0.85	2.62 ± 4.21	1.41 ± 0.67	2.45 ± 1.92	ns			Metabolite_72	1.00 ± 0.26a	0.10 ± 0.05b	0.99 ± 0.41a	0.19 ± 0.04b	***			Metabolite_72	1.00 ± 0.34	2.33 ± 1.68	0.97 ± 0.50	9.45 ± 15.99	ns
isothiocyanatocyclohexane	Metabolite_73	15.4991	1234	1260	740	792	Level 2	1122-82-3	1.00 ± 1.11	0.52 ± 0.44	1.15 ± 0.74	1.08 ± 0.75	ns			Metabolite_73	1.00 ± 0.27ab	0.20 ± 0.07b	1.94 ± 1.97a	0.34 ± 0.13b	*			Metabolite_73	1.00 ± 0.22	0.67 ± 0.07	1.19 ± 0.63	0.94 ± 0.54	ns
2,6,10,15-tetramethylheptadecane	Metabolite_74	16.5679	1270.39	-	840	843	Level 3	54833-48-6	1.00 ± 0.98	1.04 ± 1.27	1.61 ± 0.97	2.70 ± 2.12	ns			Metabolite_74	1.00 ± 0.58ab	0.19 ± 0.14b	1.49 ± 1.28a	0.26 ± 0.12b	**			Metabolite_74	1.00 ± 0.53	0.37 ± 0.08	0.91 ± 0.68	0.49 ± 0.28	ns
2,4,6-trimethyl-2-(4-methylpent-3-enyl)pyran	Metabolite_75	16.726	1276.74	-	788	803	Level 3	-	1.00 ± 1.36	0.13 ± 0.28	1.35 ± 0.94	0.72 ± 0.65	ns			Metabolite_75	1.000 ± 0.534	0.022 ± 0.047	2.032 ± 2.890	0.025 ± 0.033	ns			Metabolite_75	1.000 ± 1.853	0.002 ± 0.005	0.676 ± 1.088	0.000 ± 0.000	ns
unknown	Metabolite_76	16.7712	1278.55	-	781	802	Level 4	54833-48-6	1.00 ± 1.03	0.99 ± 1.25	1.49 ± 0.85	2.36 ± 1.75	ns			Metabolite_76	1.00 ± 0.52a	0.14 ± 0.15b	1.47 ± 1.08a	0.25 ± 0.13b	**			Metabolite_76	1.00 ± 0.45a	0.38 ± 0.10c	0.88 ± 0.58ab	0.49 ± 0.24bc	*
2,2,6-trimethyl-9,10-dioxatricyclo[6.2.2.01,6]dodecan-3-ol	Metabolite_77	16.9142	1284.29	-	675	686	Level 3	108511-85-9	1.00 ± 0.84	1.12 ± 0.65	1.37 ± 0.63	1.67 ± 0.90	ns			Metabolite_77	1.00 ± 0.16a	0.09 ± 0.10b	1.23 ± 0.53a	0.29 ± 0.15b	***			Metabolite_77	1.00 ± 0.12a	0.81 ± 0.05c	0.95 ± 0.17ab	0.86 ± 0.08bc	*
1H-indole	Metabolite_78	16.9443	1285.5	1290	945	945	Level 2	120-72-9	1.00 ± 2.38b	2075.95 ± 1805.48a	16.28 ± 40.01b	3052.97 ± 4183.07a	**			Metabolite_78	0.00000 ± 0.00000	0.00000 ± 0.00000	0.00000 ± 0.00000	0.00000 ± 0.00000	ns			Metabolite_78	1.00 ± 3.46c	1818.94 ± 2998.25b	0.00 ± 0.00c	4529.52 ± 3298.95a	***
3-[(E)-dodec-2-enyl]oxolane-2,5-dione	Metabolite_79	17.0309	1288.97	-	703	717	Level 3	19780-11-1	1.00 ± 0.87	0.48 ± 0.44	1.41 ± 0.65	1.06 ± 0.63	ns			Metabolite_79	1.000 ± 0.176a	0.027 ± 0.042b	1.377 ± 1.209a	0.229 ± 0.050b	**			Metabolite_79	1.00 ± 0.17a	0.69 ± 0.08b	0.95 ± 0.17a	0.69 ± 0.18b	***
2,2,6-trimethyl-9,10-dioxatricyclo[6.2.2.01,6]dodecan-3-ol	Metabolite_80	17.0873	1291.24	-	673	681	Level 3	108511-85-9	1.00 ± 0.77	0.39 ± 0.59	1.29 ± 0.58	1.05 ± 0.74	ns			Metabolite_80	1.000 ± 0.227a	0.031 ± 0.057b	1.353 ± 0.885a	0.199 ± 0.090b	***			Metabolite_80	1.00 ± 0.22a	0.46 ± 0.20b	0.92 ± 0.28a	0.35 ± 0.25b	***
unknown	Metabolite_81	17.2379	1297.28	-	706	724	Level 4	19780-11-1	1.00 ± 0.87	1.06 ± 1.09	1.33 ± 0.57	1.72 ± 1.17	ns			Metabolite_81	1.00 ± 0.25a	0.08 ± 0.08b	1.38 ± 0.90a	0.30 ± 0.10b	***			Metabolite_81	1.00 ± 0.29a	0.68 ± 0.12b	0.81 ± 0.25ab	0.73 ± 0.15b	*
nonyl acetate	Metabolite_82	17.3056	1305	1308	934	934	Level 2	143-13-5	1.00 ± 0.31b	0.82 ± 0.13b	1.31 ± 0.37a	0.87 ± 0.18b	**			Metabolite_82	1.00 ± 0.13a	0.27 ± 0.03b	0.98 ± 0.25a	0.34 ± 0.05b	***			Metabolite_82	1.00 ± 0.09	0.98 ± 0.10	0.95 ± 0.12	0.93 ± 0.11	ns
2,2,6-trimethyl-9,10-dioxatricyclo[6.2.2.01,6]dodecan-3-ol	Metabolite_83	17.5201	1315.78	-	673	680	Level 3	108511-85-9	1.00 ± 1.00	0.96 ± 1.12	1.35 ± 0.77	1.94 ± 1.46	ns			Metabolite_83	1.00 ± 0.38ab	0.26 ± 0.20b	1.46 ± 1.30a	0.32 ± 0.18b	*			Metabolite_83	1.00 ± 0.48a	0.36 ± 0.11b	0.79 ± 0.57ab	0.48 ± 0.31b	*
unknown	Metabolite_84	17.6744	1321.37	-	812	846	Level 4	544-76-3	1.00 ± 0.81	1.19 ± 1.36	1.36 ± 0.77	2.04 ± 1.37	ns			Metabolite_84	1.00 ± 0.42ab	0.30 ± 0.18c	1.42 ± 0.95a	0.51 ± 0.24bc	**			Metabolite_84	1.00 ± 0.39	0.64 ± 0.10	0.92 ± 0.45	0.69 ± 0.19	ns
cyclohex-3-en-1-ylbenzene	Metabolite_85	17.8739	1328.6	1345	875	939	Level 2	4994-16-5	1.00 ± 1.27	0.36 ± 0.31	1.54 ± 1.04	1.17 ± 0.90	ns			Metabolite_85	1.00 ± 0.44ab	0.17 ± 0.09b	2.17 ± 2.53a	0.27 ± 0.04b	*			Metabolite_85	1.000 ± 3.464	0.006 ± 0.016	0.000 ± 0.000	0.006 ± 0.016	ns
2,6,10,15-tetramethylheptadecane	Metabolite_86	18.0659	1335.56	-	722	753	Level 3	54833-48-6	1.00 ± 0.74	0.96 ± 0.93	1.28 ± 0.57	1.55 ± 0.91	ns			Metabolite_86	1.00 ± 0.24a	0.13 ± 0.11b	1.32 ± 0.68a	0.41 ± 0.14b	***			Metabolite_86	1.00 ± 0.25a	0.71 ± 0.09b	0.94 ± 0.30ab	0.74 ± 0.14b	*
methyl anthranylate	Metabolite_87	18.1148	1337.33	1346	852	915	Level 2	134-20-3	1.00 ± 1.95b	179.24 ± 333.10ab	1.67 ± 1.96b	245.44 ± 366.67a	*			Metabolite_87	1.000 ± 0.981	0.004 ± 0.010	3.286 ± 6.085	0.004 ± 0.009	ns			Metabolite_87	1.00 ± 1.32	0.29 ± 0.44	0.48 ± 0.71	8.67 ± 17.78	ns
N-[4-bromo-n-butyl]-2-piperidinone	Metabolite_88	18.1336	1338.01	-	701	746	Level 3	195194-80-0	1.00 ± 1.02	1.05 ± 1.43	1.39 ± 0.81	1.80 ± 1.24	ns			Metabolite_88	1.00 ± 0.41ab	0.21 ± 0.15c	1.49 ± 1.14a	0.33 ± 0.21bc	**			Metabolite_88	1.00 ± 0.45	0.49 ± 0.16	0.82 ± 0.51	0.55 ± 0.24	ns
2-Methylpropyl 3-hydroxy-2,2,4-trimethylpentanoate	Metabolite_89	18.3782	1346.88	-	825	831	Level 3	244074-78-0	1.000 ± 1.727	0.042 ± 0.078	1.513 ± 1.929	0.065 ± 0.068	ns			Metabolite_89	1.000 ± 0.659	0.087 ± 0.160	4.428 ± 8.563	0.038 ± 0.093	ns			Metabolite_89	1.000 ± 1.497	0.025 ± 0.061	0.637 ± 0.911	0.051 ± 0.080	ns
(3-hydroxy-2,4,4-trimethylpentyl) 2-methylpropanoate	Metabolite_90	18.875	1364.89	-	818	862	Level 3	74367-34-3	1.000 ± 1.351	0.020 ± 0.039	1.276 ± 1.554	0.022 ± 0.019	ns			Metabolite_90	1.00000 ± 1.14351	0.00002 ± 0.00005	2.04787 ± 3.54210	0.01358 ± 0.01432	ns			Metabolite_90	1.000 ± 1.300	0.023 ± 0.006	0.538 ± 0.786	0.021 ± 0.010	ns
2,2,6-trimethyl-9,10-dioxatricyclo[6.2.2.01,6]dodecan-3-ol	Metabolite_93	19.4396	1385.35	-	698	713	Level 3	108511-85-9	1.00 ± 0.57ab	0.50 ± 0.19c	1.18 ± 0.45a	0.62 ± 0.21bc	*			Metabolite_93	1.000 ± 0.313a	0.068 ± 0.078b	0.979 ± 0.509a	0.256 ± 0.039b	***			Metabolite_93	1.00 ± 0.14a	0.77 ± 0.03b	0.93 ± 0.13a	0.78 ± 0.05b	***
caryophyllene	Metabolite_95	20.0643	1410	1418	955	957	Level 2	87-44-5	1.00 ± 1.41b	2.40 ± 3.75ab	1.76 ± 1.71b	5.23 ± 4.15a	*			Metabolite_95	1.00 ± 1.37	0.20 ± 0.16	1.19 ± 1.56	0.16 ± 0.05	ns			Metabolite_95	1.00 ± 1.14	1.14 ± 0.87	1.33 ± 1.77	2.29 ± 0.88	ns
4a-hydroperoxy-2,5,5,8a-tetramethyl-4-methylidene-7,8-dihydro-6H-chromene	Metabolite_96	20.753	1446.68	-	670	670	Level 3	-	1.00 ± 0.53b	0.54 ± 0.05b	1.50 ± 0.75a	0.57 ± 0.20b	**			Metabolite_96	1.00 ± 0.11a	0.10 ± 0.12b	1.33 ± 0.70a	0.36 ± 0.05b	***			Metabolite_96	1.00 ± 0.12a	0.90 ± 0.03bc	0.95 ± 0.05ab	0.87 ± 0.04c	**
(1E,4E,8E)-2,6,6,9-tetramethylcycloundeca-1,4,8-triene (à-caryophyllene)	Metabolite_97	20.8697	1451.54	1456	921	927	Level 2	6753-98-6	1.00 ± 1.41b	2.59 ± 4.13ab	1.88 ± 1.81b	6.08 ± 5.20a	*			Metabolite_97	1.00 ± 1.37	0.16 ± 0.13	1.23 ± 1.63	0.13 ± 0.04	ns			Metabolite_97	1.00 ± 1.15	1.23 ± 1.05	1.28 ± 1.73	2.37 ± 1.01	ns
2,6,11,15-tetramethylhexadecane	Metabolite_98	21.7278	1487.28	-	806	850	Level 3	504-44-9	1.00 ± 0.86	1.14 ± 1.69	1.83 ± 1.48	2.29 ± 1.88	ns			Metabolite_98	1.00 ± 0.58ab	0.14 ± 0.12b	1.42 ± 1.52a	0.26 ± 0.15b	*			Metabolite_98	1.00 ± 0.78	0.48 ± 0.16	0.77 ± 0.63	0.59 ± 0.33	ns
2,6,6,9-tetramethyltricyclo[5.4.0.02,9]undec-3-ene (longifolene-(V4))	Metabolite_99	21.8746	1493.39	-	817	847	Level 3	61262-67-7	1.00 ± 0.97b	2.02 ± 3.05ab	1.55 ± 1.13b	4.72 ± 4.93a	*			Metabolite_99	1.00 ± 0.83a	0.00 ± 0.00b	1.16 ± 1.14a	0.09 ± 0.03b	*			Metabolite_99	1.00 ± 0.43b	1.09 ± 0.57b	1.14 ± 0.79b	1.91 ± 0.51a	*
unknown	Metabolite_100	22.0966	1502.64	-	697	708	Level 4	3155-71-3	1.00 ± 1.28	0.54 ± 1.15	1.89 ± 1.23	1.47 ± 1.44	ns			Metabolite_100	1.00000 ± 0.39715ab	0.00005 ± 0.00013b	1.58649 ± 1.82642a	0.00005 ± 0.00013b	*			Metabolite_100	1.00 ± 0.42a	0.59 ± 0.14b	0.80 ± 0.37ab	0.55 ± 0.22b	*
(1S-cis)-1,2,3,5,6,8a-hexahydro-4,7-dimethyl-1-(1-methylethyl)-naphthalene	Metabolite_101	22.4655	1520	1525	824	856	Level 2	483-76-1	1.00 ± 1.82	2.95 ± 4.94	2.24 ± 1.65	4.93 ± 4.14	ns			Metabolite_101	1.00 ± 0.67ab	0.34 ± 0.51b	1.71 ± 1.70a	0.34 ± 0.32b	*			Metabolite_101	1.00 ± 0.71b	1.38 ± 0.70b	1.11 ± 0.90b	3.52 ± 1.09a	***
2,6,11,15-tetramethylhexadecane	Metabolite_102	22.7703	1543.97	-	847	860	Level 3	504-44-9	1.00 ± 0.83	1.23 ± 1.89	1.79 ± 1.54	2.03 ± 1.60	ns			Metabolite_102	1.00 ± 0.52ab	0.14 ± 0.13b	1.45 ± 1.53a	0.28 ± 0.19b	*			Metabolite_102	1.00 ± 0.77	0.59 ± 0.28	0.78 ± 0.67	0.67 ± 0.33	ns
unknown	Metabolite_103	23.2558	1574.18	-	783	785	Level 4	1113-21-9	1.00 ± 1.28	1.05 ± 1.17	5.61 ± 10.37	3.02 ± 3.17	ns			Metabolite_103	1.00 ± 0.66a	0.11 ± 0.13b	0.95 ± 0.50a	0.25 ± 0.11b	***			Metabolite_103	1.00 ± 0.54	0.61 ± 0.17	0.67 ± 0.28	0.68 ± 0.13	ns
2-heptadec-7-ynoxyoxane	Metabolite_104	23.3273	1578.63	-	694	694	Level 3	56599-50-9	1.00 ± 1.21	0.33 ± 0.62	1.86 ± 1.27	1.01 ± 0.81	ns			Metabolite_104	1.000 ± 0.425ab	0.026 ± 0.063b	1.826 ± 2.254a	0.056 ± 0.063b	*			Metabolite_104	1.00 ± 0.68	0.28 ± 0.33	0.67 ± 0.65	0.33 ± 0.39	ns
isocaryophillene	Metabolite_105	23.3273	1578.63	-	825	857	Level 3	-	1.00 ± 1.28	5.94 ± 12.26	5.62 ± 8.83	12.80 ± 17.39	ns			Metabolite_105	1.0000 ± 0.6584ab	0.0006 ± 0.0014b	1.7561 ± 2.3143a	0.0006 ± 0.0014b	*			Metabolite_105	1.00 ± 0.71b	2.24 ± 2.83b	0.47 ± 0.37b	4.54 ± 3.29a	***
3-[(3E)-4,8-dimethylnona-3,7-dienyl]furan (dendrasaline)	Metabolite_106	23.6849	1600.88	1571	827	842	Level 2	23262-34-2	1.00 ± 1.75	1.20 ± 1.77	8.85 ± 16.73	3.66 ± 3.90	ns			Metabolite_106	1.000 ± 1.543	0.091 ± 0.114	0.701 ± 0.738	0.051 ± 0.065	ns			Metabolite_106	1.00 ± 1.22	0.45 ± 0.32	0.36 ± 0.39	0.55 ± 0.40	ns
diethyl benzene-1,2-dicarboxylate	Metabolite_107	24.0725	1588	1585	897	902	Level 2	84-66-2	1.00 ± 1.74b	11.45 ± 17.47b	2.26 ± 2.14b	94.51 ± 62.67a	***			Metabolite_107	1.000 ± 2.599	0.014 ± 0.033	0.653 ± 1.731	0.130 ± 0.307	ns			Metabolite_107	1.00 ± 1.71	0.79 ± 1.62	0.79 ± 0.73	0.71 ± 1.09	ns
(2Z,13E)-octadeca-2,13-dien-1-ol	Metabolite_108	24.4225	1606.78	-	717	730	Level 3	-	1.00 ± 1.50ab	0.11 ± 0.28b	1.90 ± 1.50a	0.50 ± 0.49b	*			Metabolite_108	1.00000 ± 0.66883ab	0.00009 ± 0.00021b	2.52552 ± 3.32777a	0.00009 ± 0.00021b	*			Metabolite_108	1.00 ± 0.71	0.23 ± 0.24	0.99 ± 1.01	0.74 ± 0.81	ns
N-phenylaniline	Metabolite_109	24.6333	1619.89	-	762	824	Level 3	122-39-4	1.000 ± 1.675	0.053 ± 0.106	1.616 ± 1.691	0.631 ± 0.955	ns			Metabolite_109	1.0000 ± 0.9100	0.0003 ± 0.0007	0.7516 ± 1.4590	0.0003 ± 0.0007	ns			Metabolite_109	1.00 ± 1.21	0.10 ± 0.13	1.15 ± 2.12	0.43 ± 0.41	ns

## Sheet: Supplementary Table S2
	Supplementary Table S2. Model performance of the PLS-DA fitted to assess the impact of the endophytic colonization on volatile compounds emitted from caterpillar-infested cotton plants before (i) and after (ii) infestation
	Class	Model	Mean.Overall.BER	Class	Mean.Class.Error	Predicted as cot-cnt	Predicted as cot+endo
	cot-cnt	cot-cnt vs cot+endo (i)	0.18 ± 0.05	cot-cnt	0.07 ± 0.05	788	62
	cot+endo			cot+endo	0.29 ± 0.07	244	606
						Predicted as cot+cat	Predicted as cot+endo+cat
	cot+cat	cot+cat vs cot+endo+cat (ii)	0.16 ± 0.04	cot+cat	0.1 ± 0.04	814	86
	cot+endo+cat			cot+endo+cat	0.22 ± 0.06	195	705

## Sheet: Supplementray Table S3
Supplementary Table S3. One-way analysis of variance (ANOVA) for the volatile compounds emitted from endophytically colonized melon plants before and after aphid infestation. Data are expressed as foldchange relative to the control plants. Mel-cnt: control at T0+T1, mel+aph: control and aphid-infested at T2+T3, mel+endo:treated at T0+T1, mel+endo+aph: treated and aphid-infested at T2+T3
									mel-cnt		mel+aph		mel+endo		mel+endo+aph
Compound	Code	RT (min)	MF	RMF	Identification confidence	LRIcalculated	LRIdatabase	CAS	mel-cnt-t0	mel-cnt-t1	mel+aph-t2	mel+aph-t3	mel+endo-t0	mel+endo-t1	mel+endo+aph-t2	mel+endo+aph-t3	p.value
heptane	Metabolite 1	2.08522	864	905	Level 1	706	700	142-82-5	1.00 ± 0.35b	0.90 ± 0.35b	1.69 ± 0.43b	3.28 ± 1.31b	0.94 ± 0.19b	0.91 ± 0.13b	2.49 ± 0.69b	12.22 ± 9.80a	*
2,2,6-trimethyloctane	Metabolite 2	4.8012	879	894	Level 3	721	-	62016-28-8	1.00 ± 0.25a	0.14 ± 0.12d	0.19 ± 0.08cd	0.52 ± 0.33b	0.47 ± 0.16bc	0.43 ± 0.10bcd	0.30 ± 0.12bcd	0.14 ± 0.19d	***
2,2-dimethyldecane	Metabolite 3	5.37217	865	872	Level 3	725	-	17302-37-3	1.00 ± 0.39a	0.14 ± 0.13c	0.20 ± 0.09bc	0.46 ± 0.26b	0.47 ± 0.09b	0.37 ± 0.07bc	0.27 ± 0.10bc	0.11 ± 0.11c	***
4-ethyl-2,2,6,6-tetramethylheptane	Metabolite 4	6.1584	864	888	Level 3	731	-	62108-31-0	1.00 ± 0.36a	0.18 ± 0.16d	0.29 ± 0.12bcd	0.65 ± 0.35ab	0.59 ± 0.16bc	0.48 ± 0.10bcd	0.41 ± 0.10bcd	0.21 ± 0.25cd	**
2,2,7,7-tetramethyloctane	Metabolite 5	6.51018	892	907	Level 3	734	-	1071-31-4	1.00 ± 0.42a	0.15 ± 0.13c	0.24 ± 0.09bc	0.65 ± 0.37ab	0.60 ± 0.22ab	0.49 ± 0.10bc	0.47 ± 0.12bc	0.24 ± 0.35bc	*
3,3-dimethylhexane	Metabolite 6	7.01693	841	885	Level 3	738	-	563-16-6	1.00 ± 0.27a	0.18 ± 0.14c	0.34 ± 0.11bc	0.93 ± 0.61a	0.79 ± 0.10ab	0.61 ± 0.07abc	0.65 ± 0.14abc	0.37 ± 0.46bc	*
2,5,9-trimethyldecane	Metabolite 7	7.14953	888	909	Level 3	739	-	62108-22-9	1.00 ± 0.51a	0.17 ± 0.19c	0.34 ± 0.10bc	0.83 ± 0.49ab	0.58 ± 0.18abc	0.43 ± 0.05bc	0.51 ± 0.13abc	0.23 ± 0.30c	*
2,7,10-trimethyldodecane	Metabolite 8	7.67837	835	866	Level 3	743	-	74645-98-0	1.00 ± 0.29	0.39 ± 0.44	1.02 ± 0.35	0.98 ± 0.31	0.63 ± 0.16	0.74 ± 0.09	0.56 ± 0.07	0.56 ± 0.46	ns
3,7-dimethyldecane	Metabolite 9	8.73293	865	877	Level 3	751	-	17312-54-8	1.00 ± 0.38a	0.18 ± 0.15c	0.34 ± 0.08bc	0.97 ± 0.61a	0.77 ± 0.15ab	0.60 ± 0.07abc	0.68 ± 0.11abc	0.36 ± 0.47bc	*
2,3,3-trimethyloctane	Metabolite 10	9.04365	840	858	Level 3	754	-	62016-30-2	1.00 ± 0.53	0.15 ± 0.08	0.33 ± 0.14	0.99 ± 0.50	0.66 ± 0.20	0.56 ± 0.07	0.69 ± 0.19	0.39 ± 0.54	ns
unknown	Metabolite 11	9.37047	808	837	Level 4	756	-	74630-39-0	1.00 ± 0.45	0.15 ± 0.19	0.36 ± 0.09	0.91 ± 0.56	0.73 ± 0.25	0.54 ± 0.09	0.64 ± 0.13	0.32 ± 0.41	ns
2,3,6,7-tetramethyloctane	Metabolite 12	9.5756	872	896	Level 3	758	-	52670-34-5	1.00 ± 0.53	0.16 ± 0.17	0.38 ± 0.10	1.01 ± 0.54	0.68 ± 0.09	0.58 ± 0.04	0.77 ± 0.14	0.37 ± 0.49	ns
2,2,3-trimethyldecane	Metabolite 13	9.89827	868	886	Level 3	760	-	62338-09-4	1.00 ± 0.50	0.21 ± 0.22	0.35 ± 0.08	1.00 ± 0.53	0.54 ± 0.15	0.48 ± 0.02	0.60 ± 0.11	0.45 ± 0.50	ns
2-ethylhexyl nonyl sulfite	Metabolite 14	10.9599	850	860	Level 3	768	-	-	1.00 ± 0.45	0.17 ± 0.05	0.45 ± 0.09	1.33 ± 0.64	0.88 ± 0.08	0.60 ± 0.23	1.10 ± 0.17	0.73 ± 0.90	ns
2-butyloctan-1-ol	Metabolite 15	11.3972	833	876	Level 3	772	-	735273	1.00 ± 0.46	0.28 ± 0.15	0.43 ± 0.10	1.16 ± 0.55	0.86 ± 0.17	0.77 ± 0.02	0.90 ± 0.20	0.75 ± 0.87	ns
5-methyl-2-propan-2-ylheptan-1-ol	Metabolite 16	12.8506	817	823	Level 3	783	-	91337-07-4	1.00 ± 0.67a	0.22 ± 0.15c	0.34 ± 0.04bc	0.90 ± 0.48ab	0.78 ± 0.30ab	0.65 ± 0.22abc	0.56 ± 0.06abc	0.15 ± 0.12c	*
4-methylundec-1-ene	Metabolite 17	14.1059	839	857	Level 3	793	-	74630-39-0	1.00 ± 0.52a	0.31 ± 0.23c	0.45 ± 0.11bc	1.02 ± 0.34a	0.98 ± 0.16a	0.69 ± 0.10abc	0.89 ± 0.15ab	0.71 ± 0.14abc	*
2,3,5,8-tetramethyldecane	Metabolite 18	14.3056	834	840	Level 3	794	-	192823-15-7	1.00 ± 0.37a	0.20 ± 0.17c	0.39 ± 0.08c	0.92 ± 0.35a	0.92 ± 0.18a	0.46 ± 0.07bc	0.76 ± 0.10ab	0.44 ± 0.16bc	**
(E)-hex-2-enal	Metabolite 19	15.0445	801	815	Level 1	1227	1218	6728-26-3	1.00 ± 0.73	0.29 ± 0.20	0.25 ± 0.10	1.92 ± 1.58	0.55 ± 0.26	0.41 ± 0.10	0.38 ± 0.10	0.24 ± 0.04	ns
unknown	Metabolite 20	15.2114	808	836	Level 4	1223	-	192823-15-7	1.00 ± 0.27	0.21 ± 0.09	0.67 ± 0.30	0.83 ± 0.84	1.04 ± 0.40	0.60 ± 0.08	0.93 ± 0.20	0.35 ± 0.36	ns
2-ethyldecan-1-ol	Metabolite 21	15.3482	817	835	Level 3	1226	-	21078-65-9	1.00 ± 0.63ab	0.23 ± 0.20c	0.44 ± 0.16bc	1.12 ± 0.61a	0.48 ± 0.16bc	0.27 ± 0.17c	0.36 ± 0.06c	0.18 ± 0.08c	*
(Z)-tridec-3-ene	Metabolite 23	15.7876	850	856	Level 1	1239	-	41446-53-1	1.00 ± 0.49	0.20 ± 0.19	0.33 ± 0.06	0.91 ± 0.52	0.92 ± 0.40	0.68 ± 0.11	0.65 ± 0.03	0.36 ± 0.38	ns
2,3,5,8-tetramethyldecane	Metabolite 24	15.9004	834	849	Level 3	1242	-	192823-15-7	1.00 ± 0.42ab	0.17 ± 0.18c	0.34 ± 0.14c	1.01 ± 0.56a	0.61 ± 0.19abc	0.40 ± 0.01c	0.49 ± 0.11bc	0.36 ± 0.37c	*
1-(4-bromobutyl)piperidin-2-one	Metabolite 25	16.2605	809	846	Level 3	1252	-	195194-80-0	1.00 ± 0.49a	0.08 ± 0.09d	0.34 ± 0.14bcd	0.77 ± 0.46ab	0.83 ± 0.23a	0.59 ± 0.12abc	0.58 ± 0.11abc	0.25 ± 0.26cd	*
2-methylundecane-2-thiol	Metabolite 27	17.0535	816	818	Level 3	1274	-	10059-13-9	1.00 ± 0.36a	0.19 ± 0.16c	0.39 ± 0.32bc	1.04 ± 0.51a	1.02 ± 0.25a	0.77 ± 0.05abc	0.83 ± 0.12ab	0.48 ± 0.56abc	*
2-(hexadecoxymethyl)oxirane	Metabolite 29	17.5387	690	746	Level 3	1287	-	15965-99-8	1.00 ± 0.37	0.16 ± 0.15	0.26 ± 0.04	0.77 ± 0.67	0.70 ± 0.15	0.46 ± 0.13	0.47 ± 0.07	0.35 ± 0.25	ns
3,5,24-trimethyltetracontane	Metabolite 30	17.6944	828	856	Level 3	1291	-	55162-61-3	1.00 ± 0.20b	0.67 ± 0.53b	0.98 ± 0.15b	1.88 ± 0.55a	0.85 ± 0.24b	1.80 ± 0.33a	1.32 ± 0.15ab	0.97 ± 0.81b	*
2-butyl-1,1,3-trimethylcyclohexane	Metabolite 31	18.2173	823	858	Level 3	1306	-	54676-39-0	1.00 ± 0.42ab	0.16 ± 0.08d	0.42 ± 0.23cd	0.87 ± 0.45abc	1.16 ± 0.21a	0.70 ± 0.15abcd	0.87 ± 0.12abc	0.54 ± 0.52bcd	*
acetic acid;hex-4-en-1-ol	Metabolite 32	18.6556	772	809	Level 1	1326	1326	72237-36-6	1.00 ± 0.57a	0.20 ± 0.12b	0.26 ± 0.07b	0.57 ± 0.24b	0.57 ± 0.11b	0.40 ± 0.04b	0.47 ± 0.05b	0.26 ± 0.21b	*
ethyl heptanoate	Metabolite 33	19.1403	858	863	Level 1	1344	1332	106-30-9	1.00 ± 0.30bc	0.31 ± 0.22d	1.09 ± 0.01bc	1.58 ± 0.41a	0.97 ± 0.17c	1.43 ± 0.07ab	1.30 ± 0.01abc	1.17 ± 0.40abc	***
1-iodo-2-methylundecane	Metabolite 34	19.3657	817	858	Level 3	1353	-	73105-67-6	1.00 ± 0.36ab	0.30 ± 0.19c	0.43 ± 0.18c	1.05 ± 0.40ab	1.51 ± 0.40a	1.30 ± 0.12a	1.18 ± 0.07ab	0.73 ± 0.52bc	**
unknown	Metabolite 35	19.5399	798	816	Level 4	1359	-	74630-39-0	1.00 ± 0.33a	0.16 ± 0.13e	0.34 ± 0.13de	0.84 ± 0.43ab	0.82 ± 0.14abc	0.51 ± 0.05bcde	0.64 ± 0.05abcd	0.39 ± 0.41cde	*
hexadecan-4-yl 2,2,2-trifluoroacetate	Metabolite 36	19.7261	812	854	Level 3	1370	-	-	1.00 ± 0.38cd	0.55 ± 0.38d	1.22 ± 0.21bc	1.53 ± 0.58abc	0.96 ± 0.25cd	1.86 ± 0.30a	1.64 ± 0.11ab	1.37 ± 0.24abc	**
3-methyltridecane	Metabolite 37	20.1015	833	876	Level 2	1381	1366	6418-41-3	1.00 ± 0.56c	1.49 ± 0.89c	2.46 ± 0.77bc	4.95 ± 1.89a	2.07 ± 1.64c	4.41 ± 0.55ab	4.47 ± 0.62ab	2.73 ± 2.14abc	*
2,6,10,14-tetramethylheptadecane	Metabolite 39	21.1319	849	862	Level 3	1419	-	18344-37-1	1.00 ± 0.21ab	0.25 ± 0.21c	0.54 ± 0.22bc	1.42 ± 0.66a	0.99 ± 0.19ab	0.95 ± 0.04ab	1.11 ± 0.07ab	0.71 ± 0.64bc	*
nonanal	Metabolite 40	21.3061	850	853	Level 1	1409	1400	124-19-6	1.00 ± 0.39ab	0.52 ± 0.43cd	0.48 ± 0.07d	1.19 ± 0.15a	1.04 ± 0.14a	0.92 ± 0.09abc	0.50 ± 0.06d	0.61 ± 0.16bcd	**
2-butyloctan-1-ol	Metabolite 41	22.1113	803	839	Level 3	1419	-	735273	1.00 ± 0.72c	3.61 ± 2.25bc	9.15 ± 3.23ab	14.94 ± 6.69a	0.97 ± 0.11c	14.23 ± 2.49a	15.57 ± 1.86a	9.06 ± 8.86ab	**
unknown	Metabolite 42	22.3201	781	856	Level 4	1424		2425-77-6	1.00 ± 0.36	0.33 ± 0.25	0.77 ± 0.20	1.29 ± 0.51	1.20 ± 0.61	1.37 ± 0.47	1.29 ± 0.12	0.87 ± 0.88	ns
unknown	Metabolite 43	22.4683	897	897	Level 4	1427	-	151-19-9	1.00 ± 0.33c	8.59 ± 8.97abc	2.02 ± 0.54c	12.89 ± 5.55ab	1.42 ± 0.25c	6.20 ± 0.75abc	3.33 ± 0.28bc	15.95 ± 12.55a	*
unknown	Metabolite 44	23.0765	-	-	Level 4	1442	-	27831-13-6	1.00 ± 0.16a	0.25 ± 0.15c	0.50 ± 0.14bc	0.77 ± 0.28ab	1.05 ± 0.04a	0.96 ± 0.10a	0.79 ± 0.06ab	0.50 ± 0.33bc	***
unknown	Metabolite 45	24.2574	884	898	Level 4	1469	-	36653-82-4	1.00 ± 0.38a	0.32 ± 0.16c	0.53 ± 0.17bc	0.86 ± 0.29ab	0.20 ± 0.02c	0.79 ± 0.16ab	0.79 ± 0.07ab	0.60 ± 0.43abc	*
decanal	Metabolite 46	24.6635	842	864	Level 1	1479	1475	112-31-2	1.00 ± 0.66cd	2.68 ± 1.75b	2.26 ± 0.19bc	1.76 ± 0.46bcd	0.34 ± 0.02d	6.96 ± 1.36a	2.52 ± 0.31b	2.00 ± 0.46bc	***
2-ethylhexan-1-ol	Metabolite 47	25.1778	821	850	Level 1	1490	1491	104-76-7	1.000 ± 0.507a	0.104 ± 0.111c	0.080 ± 0.018c	0.184 ± 0.055c	0.625 ± 0.116b	0.348 ± 0.146bc	0.059 ± 0.012c	0.081 ± 0.015c	***
benzaldehyde	Metabolite 48	25.5657	900	905	Level 1	1510	1520	100-52-7	1.00 ± 0.47	0.37 ± 0.29	0.30 ± 0.03	1.77 ± 1.46	0.52 ± 0.13	0.85 ± 0.07	0.38 ± 0.04	0.51 ± 0.12	ns
3,7-dimethylocta-1,6-dien-3-ol	Metabolite 49	26.2022	720	784	Level 1	1539	1552	78-70-6	1.00 ± 0.36	0.58 ± 0.52	0.69 ± 0.22	1.77 ± 0.98	1.35 ± 0.63	0.73 ± 0.23	0.91 ± 0.18	1.16 ± 0.23	ns
6-methyloctadecane	Metabolite 50	26.4409	759	844	Level 3	1547	-	10544-96-4	1.00 ± 0.28b	0.82 ± 0.27b	0.91 ± 0.32b	1.75 ± 1.02b	0.95 ± 0.29b	6.21 ± 2.65a	1.07 ± 0.87b	1.70 ± 1.16b	***
oxolan-2-one	Metabolite 51	28.8659	764	856	Level 3	1643	1645	96-48-0	1.00 ± 0.27c	3.41 ± 2.29b	0.91 ± 0.03c	0.61 ± 0.11c	0.67 ± 0.05c	9.77 ± 1.37a	1.00 ± 0.08c	0.61 ± 0.07c	***
N,N'-bis(carbobenzyloxy)-lysine methyl	Metabolite 52	31.6071	662	676	Level 3	1672	-	-	1.00 ± 0.19	9.53 ± 8.48	0.80 ± 0.21	3.78 ± 0.82	0.73 ± 0.18	2.69 ± 1.11	0.96 ± 0.58	4.67 ± 2.96	ns
phenyl carbamate	Metabolite 53	39.0564	650	854	Level 3	1996	2006	622-46-8	1.00 ± 0.18a	0.55 ± 0.29cd	0.53 ± 0.07d	0.80 ± 0.10abc	0.88 ± 0.10ab	1.02 ± 0.22a	0.53 ± 0.04cd	0.68 ± 0.08bcd	**

## Sheet: Supplementary Table S4
	Supplementary Table S4. Model performance of the PLS-DA fitted to assess the impact of endophytic colonization on volatile compounds emitted from aphid-infested melon plants
	Class	Model	Mean Overall BER	Class	Class Mean Error	Predicted as mel-cnt	Predicted as mel+aph	Predicted as mel+endo	Predicted as mel+endo+aph
	mel-cnt	mel-cnt vs mel+aph vs mel+endo vs mel+endo+aph	0.14 ± 0.07	mel-cnt	0.15 ± 0.18	255	18	24	3
	mel+aph			mel+aph	0.24 ± 0.17	10	228	5	57
	mel+endo			mel+endo	0.21 ± 0.18	50	7	237	6
	mel+endo+aph			mel+endo+aph	0.12 ± 0.17	0	35	1	264
